# Supplementary material for: GABA-Alleviated Oxidative Injury Induced by Salinity, Osmotic Stress and their Combination by Regulating Cellular and Molecular Signals in Rice
Source: PubMed Central journal article supplement (PMC6888568; doi:10.3390/ijms20225709), 2019-11-14
Supplement: ijms-20-05709-s001.pdf [file ijms-20-05709-s001.pdf]

**Supplementary Table S1.** Sequences of oligonucleotide primers used in QRT-PCR.

| <b>Primer name</b> | <b>Primer orientation</b> | <b>Sequence (5'-3')</b>   |
|--------------------|---------------------------|---------------------------|
| <i>ACT</i>         | Forward                   | CTTCATAGGAATGGAAGCTGCGGGT |
|                    | Reverse                   | CGACCACCTTGATCTTCATGCTGCT |
| <i>PAL1</i>        | Forward                   | ATAGAGCGGGAGGTCAACTC      |
|                    | Reverse                   | AAGGCAGACCGTTGTTGTAG      |
| <i>PPO</i>         | Forward                   | TCTACAACGAGAGGCGTGAC      |
|                    | Reverse                   | GGTCGATCAGCTGGTCTCTT      |
| <i>IbCAD1</i>      | Forward                   | ATCTTGATTGTCTCAATCTA      |
|                    | Reverse                   | GGACATTATTACATTACAC       |
| <i>SKDH</i>        | Forward                   | TCTTGCAAACACAACAGCAA      |
|                    | Reverse                   | CACATTCTGCAGCTTCCCTA      |
| <i>SbGST</i>       | Forward                   | CTCGAGAGGTGAAAGTTCTAGGA   |
|                    | Reverse                   | GGTACAGCTGCTTGGTACTTAGCCA |
| <i>Chi2</i>        | Forward                   | GCTAGGTTGGCATGATCAAA      |
|                    | Reverse                   | GAACGCAACTCTCTCCCTTC      |
| <i>APXa</i>        | Forward                   | GCTGAGTGACCCTGCCTTCC      |
|                    | Reverse                   | CCCAGTTCGGAGAGCTTGA       |
| <i>CATa</i>        | Forward                   | GGAAGCTGTTTCGTCAGGTGAT    |
|                    | Reverse                   | TCCGGCCATGTCTTGGTGTC      |
| <i>SOD1</i>        | Forward                   | GGGAGATGGTCCCACCACTG      |
|                    | Reverse                   | GGCCCAGTTGACATGCAACC      |
| <i>OsCIPK01</i>    | Forward                   | CATGAAAAATGGCAGGGGTT      |
|                    | Reverse                   | CAGACGGGCAAGAAGAGAGC      |
| <i>OsCIPK02</i>    | Forward                   | ATGGGCATTGATGCAGAGAT      |
|                    | Reverse                   | GCAAAAACAGTAACATCCAGAAAC  |
| <i>OsCIPK03</i>    | Forward                   | CAGGCACTGAATCTGGACAA      |
|                    | Reverse                   | GCTACTCTACGGCGAACACC      |
| <i>OsCIPK07</i>    | Forward                   | ATGGAGATGTCGGAGGTGTC      |
|                    | Reverse                   | CATTCTACCAACAATTTAG       |
| <i>OsCIPK08</i>    | Forward                   | TGAGGCATCCGAATGTGGTT      |
|                    | Reverse                   | CGCCAGTGATGAACTCCAAGAT    |
| <i>OsCIPK09</i>    | Forward                   | CTCGACCGCAACCATGTG        |
|                    | Reverse                   | TCATTGTGGAAATCTCCCGTTT    |
| <i>OsCIPK12</i>    | Forward                   | TTTACCGGACCAAACCTGAC      |
|                    | Reverse                   | AATGGCATCAGGAATGGAAG      |
| <i>OsCIPK15</i>    | Forward                   | AGGAGGGAAGGAATGGTGTT      |
|                    | Reverse                   | TTGAAAGGCTCAAAGCCAAT      |
| <i>OsCIPK17</i>    | Forward                   | GCTTGGCCCTTCTGTAATG       |
|                    | Reverse                   | CGGTGGCTAGTTTTTGAACC      |
